# Supplementary material for: Inhibitors of ribosome biogenesis repress the growth of MYCN-amplified neuroblastoma
Source: PubMed Central journal article supplement (PMC6484764; doi:10.1038/s41388-018-0611-7), 2018-12-12
Supplement: 41388_2018_611_MOESM3_ESM.pdf [file 41388_2018_611_MOESM3_ESM.pdf]

SUPPLEMENTARY FIGURE 2

A

Neuroblastoma Versteeg-88

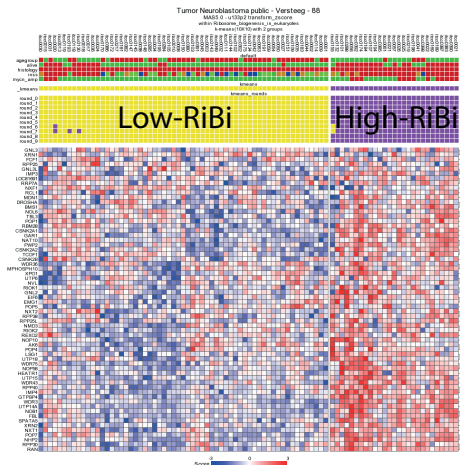

K-means clustering, 2 groups  
"ribosome biogenesis in eukaryotes"

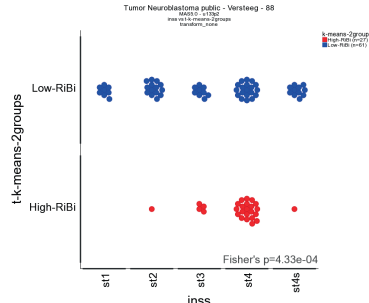

Distribution of High-RiBi and Low-RiBi tumors in INSS tumor stages

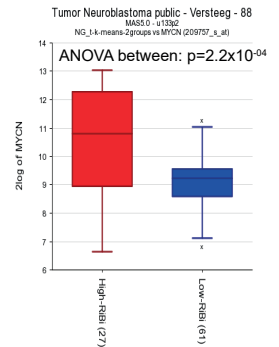

MYCN expression in High-RiBi and Low-RiBi tumors

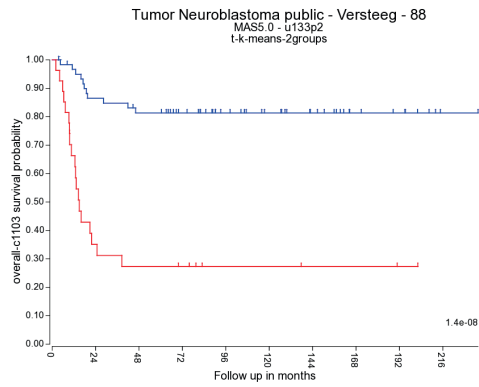

Overall survival between Low-RiBi and High-RiBi tumors

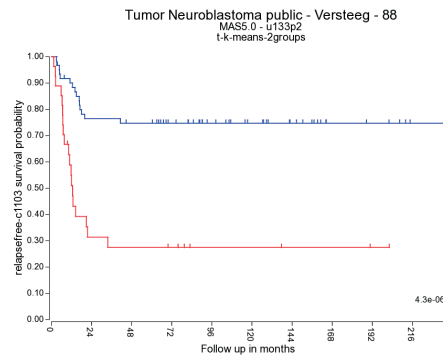

Relapsefree survival between Low-RiBi and High-RiBi tumors

B

Neuroblastoma Maris-101

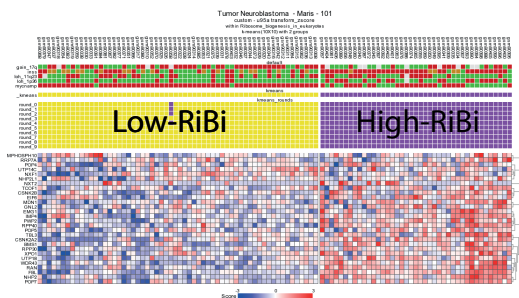

K-means clustering, 2 groups  
"ribosome biogenesis in eukaryotes"

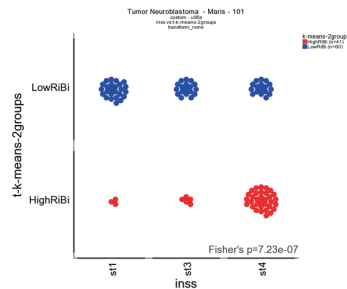

Distribution of High-RiBi and Low-RiBi tumors in INSS tumor stages

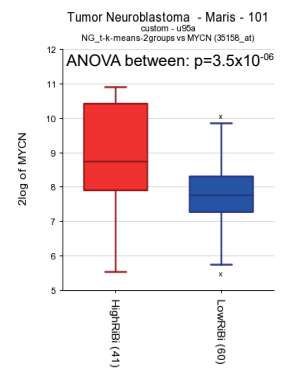

MYCN expression in High-RiBi and Low-RiBi tumors
