# Supplementary material for: Inhibitors of ribosome biogenesis repress the growth of MYCN-amplified neuroblastoma
Source: PubMed Central journal article supplement (PMC6484764; doi:10.1038/s41388-018-0611-7), 2018-12-12
Supplement: 41388_2018_611_MOESM4_ESM.pdf [file 41388_2018_611_MOESM4_ESM.pdf]

C

Neuroblastoma Oberthuer-251

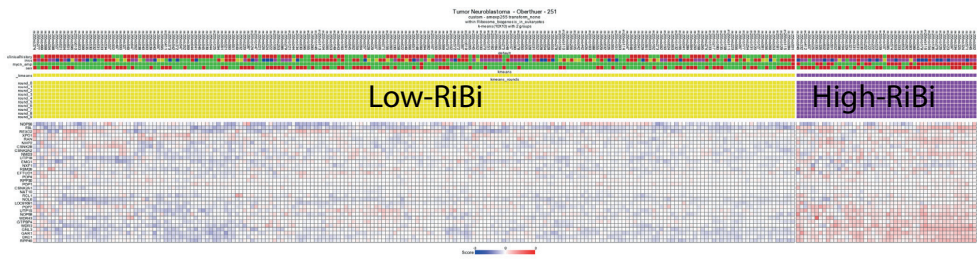

2 color array containing negative values. To avoid filter out, K-mean's settings were as follow:  
 -floor value: -500  
 -range: 0  
 -max exp: -500

K-means clustering, 2 groups  
 "ribosome biogenesis in eukaryotes"

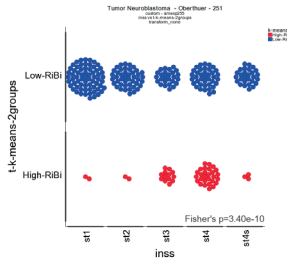

Distribution of High-RiBi and Low-RiBi tumors in INSS tumor stages

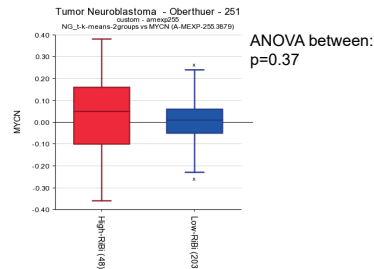

MYCN expression in High-RiBi and Low-RiBi tumors

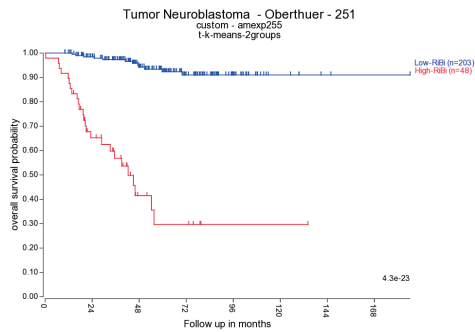

Overall survival between Low-RiBi and High-RiBi tumors

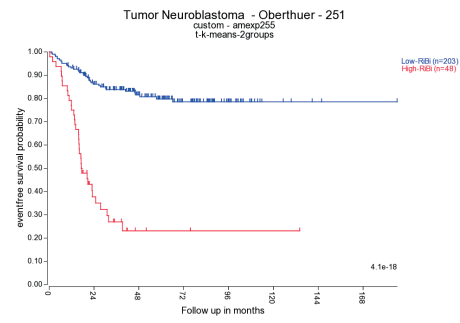

Eventfree survival between Low-RiBi and High-RiBi tumors

D

Neuroblastoma non-MYCN-amplified - Seeger-102

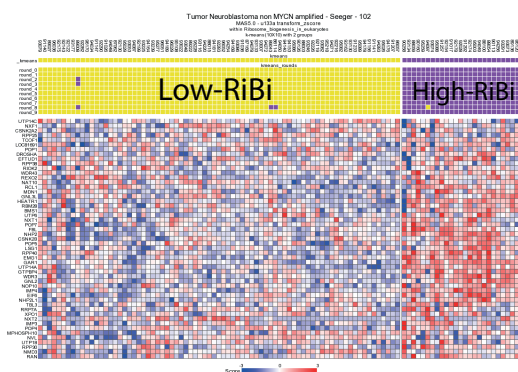

K-means clustering, 2 groups  
 "ribosome biogenesis in eukaryotes"

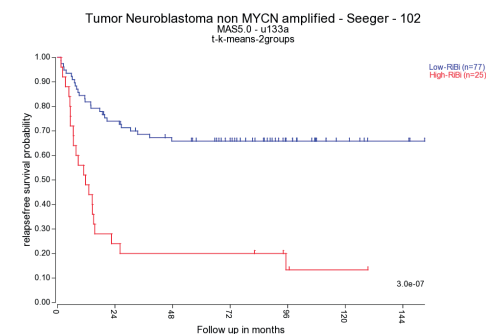

Relapsefree survival between Low-RiBi and High-RiBi tumors
