# Supplementary material for: Inhibitors of ribosome biogenesis repress the growth of MYCN-amplified neuroblastoma
Source: PubMed Central journal article supplement (PMC6484764; doi:10.1038/s41388-018-0611-7), 2018-12-12

# SUPPLEMENTARY FIGURE 3

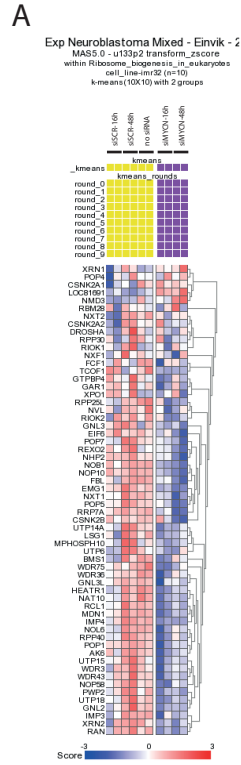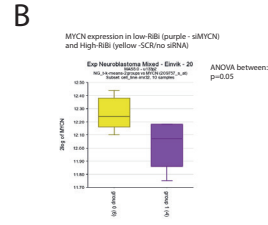

Supplement: 41388_2018_611_MOESM5_ESM.pdf [file 41388_2018_611_MOESM5_ESM.pdf]
